# Supplementary material for: Sufentanil target controlled infusion (TCI) versus remifentanil TCI for monitored anaesthesia care for patients with severe tracheal stenosis undergoing fiberoptic bronchoscopy: protocol for a prospective, randomised, controlled study
Source: HighWire-hosted journal article supplement (doi:10.1136/bmjopen-2021-058662), 2022-08-01
Supplement: bmjopen-2021-058662supp003_data_supplement.pdf [file bmjopen-2021-058662supp003_data_supplement.pdf]

|                          |                                                                            |                   |                                                                                                     |
|--------------------------|----------------------------------------------------------------------------|-------------------|-----------------------------------------------------------------------------------------------------|
| Protocol No:             | P20200828V3                                                                |                   |                                                                                                     |
| Site                     | <input type="checkbox"/> <input type="checkbox"/>                          | Subject ID:       | <input type="checkbox"/> <input type="checkbox"/> <input type="checkbox"/>                          |
| Randomisation No:        | <input type="checkbox"/> <input type="checkbox"/>                          | Subject Initials: | <input type="checkbox"/> <input type="checkbox"/> <input type="checkbox"/> <input type="checkbox"/> |
| Investigator Identifier: | <input type="checkbox"/> <input type="checkbox"/> <input type="checkbox"/> |                   |                                                                                                     |

### Case Report Form

**Sufentanil target controlled infusion (TCI) vs remifentanil TCI  
for monitored anaesthesia care for patients with severe tracheal  
stenosis undergoing fiberoptic bronchoscopy**

By  
**Shanghai Pulmonary Hospital**

V20200828-03

**Inclusion Criteria**

| Subjects who meet the following criteria may be included in the study. Did the subject meet the following criteria requirements for inclusion? (✓ Yes or No) |                           | Yes<br>1 | No*<br>2 |
|--------------------------------------------------------------------------------------------------------------------------------------------------------------|---------------------------|----------|----------|
| 01                                                                                                                                                           | Cotton-Myer grades II-III |          |          |
| 02                                                                                                                                                           | Aged 18–65 years          |          |          |
| 03                                                                                                                                                           | ASA I-III                 |          |          |

\* If No, document on Subject Eligibility Page.

**Exclusion Criteria**

| The following will exclude potential subjects from the study. Does the subject have any of the following? ( √ Yes or No) |                                                              | Yes*<br>1 | No<br>2 |
|--------------------------------------------------------------------------------------------------------------------------|--------------------------------------------------------------|-----------|---------|
| 01                                                                                                                       | BMI>30 or < 18.5                                             |           |         |
| 02                                                                                                                       | Baseline oxygen desaturation (resting SpO <sub>2</sub> <90%) |           |         |
| 03                                                                                                                       | Pregnancy                                                    |           |         |
| 04                                                                                                                       | History of allergy to related drugs                          |           |         |
| 05                                                                                                                       | Severe coagulation dysfunction                               |           |         |
| 06                                                                                                                       | Severe hepatic and renal dysfunction                         |           |         |
| 07                                                                                                                       | Gastroesophageal reflux disease                              |           |         |
| 08                                                                                                                       | History of abnormal recovery from anaesthesia                |           |         |
| 09                                                                                                                       | No informed consent                                          |           |         |
|                                                                                                                          |                                                              |           |         |

\*If Yes, document on Subject Eligibility Page

**Information Session**

| Date of Information Session        | Did the subject attend the Information Session?                                  | Comments |
|------------------------------------|----------------------------------------------------------------------------------|----------|
| ____ / ____ / ____<br>DD / MM / YY | 1 <input type="checkbox"/> Yes<br>2 <input type="checkbox"/> No (explain, if No) |          |

**Subject Eligibility**

| Date the Subject Signed the Informed Consent Form:                                                                   |                         | ____ / ____ / ____<br>DD / MM / YY |                                |                                 |
|----------------------------------------------------------------------------------------------------------------------|-------------------------|------------------------------------|--------------------------------|---------------------------------|
| Did the subject meet all of the inclusion/exclusion criteria?                                                        |                         | 1 <input type="checkbox"/> Yes     |                                |                                 |
|                                                                                                                      |                         | 2 <input type="checkbox"/> No      |                                |                                 |
| If the subject did not meet all of the Inclusion/Exclusion criteria, provide criterion number and explanation below. |                         |                                    |                                |                                 |
| Category                                                                                                             | Inclusion/Exclusion No. | Explanation                        | Exemption Granted?             | If Yes, Date Granted DD/MM/YYYY |
| 1 <input type="checkbox"/> Inclusion                                                                                 |                         |                                    | 1 <input type="checkbox"/> Yes | ____ / ____ / ____              |
| 2 <input type="checkbox"/> Exclusion                                                                                 |                         |                                    | 2 <input type="checkbox"/> No  |                                 |
| 1 <input type="checkbox"/> Inclusion                                                                                 |                         |                                    | 1 <input type="checkbox"/> Yes | ____ / ____ / ____              |
| 2 <input type="checkbox"/> Exclusion                                                                                 |                         |                                    | 2 <input type="checkbox"/> No  |                                 |
| 1 <input type="checkbox"/> Inclusion                                                                                 |                         |                                    | 1 <input type="checkbox"/> Yes | ____ / ____ / ____              |
| 2 <input type="checkbox"/> Exclusion                                                                                 |                         |                                    | 2 <input type="checkbox"/> No  |                                 |

**Demographics**

|                                                                                                                                                                                                                |                                                                                                                                                                                       |                                                                                                                                                                                       |                                                                                                       |
|----------------------------------------------------------------------------------------------------------------------------------------------------------------------------------------------------------------|---------------------------------------------------------------------------------------------------------------------------------------------------------------------------------------|---------------------------------------------------------------------------------------------------------------------------------------------------------------------------------------|-------------------------------------------------------------------------------------------------------|
| Date<br>DD/MM/YYYY                                                                                                                                                                                             | Date of Birth<br>DD/MM/YYYY                                                                                                                                                           | Gender                                                                                                                                                                                | Ethnicity                                                                                             |
| <input type="checkbox"/> <input type="checkbox"/> / <input type="checkbox"/> <input type="checkbox"/> / <input type="checkbox"/> <input type="checkbox"/> <input type="checkbox"/><br><input type="checkbox"/> | <input type="checkbox"/> <input type="checkbox"/> / <input type="checkbox"/> <input type="checkbox"/> / <input type="checkbox"/> <input type="checkbox"/><br><input type="checkbox"/> | 1 <input type="checkbox"/> Male                                                                                                                                                       | 1 <input type="checkbox"/> Han                                                                        |
|                                                                                                                                                                                                                |                                                                                                                                                                                       | 2 <input type="checkbox"/> Female                                                                                                                                                     | 2 <input type="checkbox"/> Non-han                                                                    |
| <b>Body Measurements</b>                                                                                                                                                                                       |                                                                                                                                                                                       |                                                                                                                                                                                       |                                                                                                       |
| Were Body Measurements Collected?                                                                                                                                                                              |                                                                                                                                                                                       | Date<br>DD/MM/YYYY                                                                                                                                                                    |                                                                                                       |
| 1 <input type="checkbox"/> Yes 2 <input type="checkbox"/> No                                                                                                                                                   |                                                                                                                                                                                       | <input type="checkbox"/> <input type="checkbox"/> / <input type="checkbox"/> <input type="checkbox"/> / <input type="checkbox"/> <input type="checkbox"/> <input type="checkbox"/>    |                                                                                                       |
| Parameter                                                                                                                                                                                                      | Unit                                                                                                                                                                                  | Result                                                                                                                                                                                |                                                                                                       |
| Height                                                                                                                                                                                                         | cm                                                                                                                                                                                    | <input type="checkbox"/> <input type="checkbox"/> <input type="checkbox"/>                                                                                                            |                                                                                                       |
| Weight                                                                                                                                                                                                         | Kg                                                                                                                                                                                    | <input type="checkbox"/> <input type="checkbox"/> <input type="checkbox"/>                                                                                                            |                                                                                                       |
| <b>Vital Signs</b>                                                                                                                                                                                             |                                                                                                                                                                                       |                                                                                                                                                                                       |                                                                                                       |
| Were Body Measurements Collected?                                                                                                                                                                              |                                                                                                                                                                                       | Date                                                                                                                                                                                  |                                                                                                       |
| 1 <input type="checkbox"/> Yes 2 <input type="checkbox"/> No                                                                                                                                                   |                                                                                                                                                                                       | <input type="checkbox"/> <input type="checkbox"/> / <input type="checkbox"/> <input type="checkbox"/> / <input type="checkbox"/> <input type="checkbox"/> <input type="checkbox"/>    |                                                                                                       |
| Parameter                                                                                                                                                                                                      | Unit                                                                                                                                                                                  | Result                                                                                                                                                                                |                                                                                                       |
| Systolic Blood Pressure                                                                                                                                                                                        | mmHg                                                                                                                                                                                  | <input type="checkbox"/> <input type="checkbox"/> <input type="checkbox"/>                                                                                                            |                                                                                                       |
| Diastolic Blood Pressure                                                                                                                                                                                       | mmHg                                                                                                                                                                                  | <input type="checkbox"/> <input type="checkbox"/> <input type="checkbox"/>                                                                                                            |                                                                                                       |
| Heart Rate                                                                                                                                                                                                     | beats/minute                                                                                                                                                                          | <input type="checkbox"/> <input type="checkbox"/> <input type="checkbox"/>                                                                                                            |                                                                                                       |
| Respiratory Rate                                                                                                                                                                                               | breaths/minute                                                                                                                                                                        | <input type="checkbox"/> <input type="checkbox"/>                                                                                                                                     |                                                                                                       |
| Body Temperature                                                                                                                                                                                               | ° C                                                                                                                                                                                   | <input type="checkbox"/> <input type="checkbox"/> . <input type="checkbox"/>                                                                                                          |                                                                                                       |
| <b>12-Lead Electrocardiogram Report</b>                                                                                                                                                                        |                                                                                                                                                                                       |                                                                                                                                                                                       |                                                                                                       |
| Was ECG performed?                                                                                                                                                                                             |                                                                                                                                                                                       | Date<br>DD/MM/YYYY                                                                                                                                                                    | Actual Time<br>24-hour clock                                                                          |
| 1 <input type="checkbox"/> Yes 2 <input type="checkbox"/> No                                                                                                                                                   |                                                                                                                                                                                       | <input type="checkbox"/> <input type="checkbox"/> / <input type="checkbox"/> <input type="checkbox"/> / <input type="checkbox"/> <input type="checkbox"/><br><input type="checkbox"/> | <input type="checkbox"/> <input type="checkbox"/> : <input type="checkbox"/> <input type="checkbox"/> |
| ECG Interpretation:                                                                                                                                                                                            | 1 <input type="checkbox"/> Normal                                                                                                                                                     | 2 <input type="checkbox"/> Abnormal,<br>NCS                                                                                                                                           | 3 <input type="checkbox"/> Abnormal                                                                   |
| Comments Regarding CS Findings:                                                                                                                                                                                |                                                                                                                                                                                       |                                                                                                                                                                                       |                                                                                                       |
|                                                                                                                                                                                                                |                                                                                                                                                                                       |                                                                                                                                                                                       |                                                                                                       |

**Medical History**

| Does the subject have any relevant medical history?          |                                                                                        | Date<br>DD/MM/YYYY                                                                     |                                    |
|--------------------------------------------------------------|----------------------------------------------------------------------------------------|----------------------------------------------------------------------------------------|------------------------------------|
| 1 <input type="checkbox"/> Yes 2 <input type="checkbox"/> No |                                                                                        | ____/____/____                                                                         |                                    |
| Diagnosis/Procedure                                          | Date of Onset<br>DD/MM/YYYY                                                            | Date of Resolution<br>DD/MM/YYYY                                                       |                                    |
| 1                                                            | <input type="checkbox"/> <input type="checkbox"/> _/_/____<br><input type="checkbox"/> | <input type="checkbox"/> <input type="checkbox"/> _/_/____<br><input type="checkbox"/> | 9 <input type="checkbox"/> ONGOING |
| 2                                                            | <input type="checkbox"/> <input type="checkbox"/> _/_/____<br><input type="checkbox"/> | <input type="checkbox"/> <input type="checkbox"/> _/_/____<br><input type="checkbox"/> | 9 <input type="checkbox"/> ONGOING |
| 3                                                            | <input type="checkbox"/> <input type="checkbox"/> _/_/____<br><input type="checkbox"/> | <input type="checkbox"/> <input type="checkbox"/> _/_/____<br><input type="checkbox"/> | 9 <input type="checkbox"/> ONGOING |
| 4                                                            | <input type="checkbox"/> <input type="checkbox"/> _/_/____<br><input type="checkbox"/> | <input type="checkbox"/> <input type="checkbox"/> _/_/____<br><input type="checkbox"/> | 9 <input type="checkbox"/> ONGOING |
| 5                                                            | <input type="checkbox"/> <input type="checkbox"/> _/_/____<br><input type="checkbox"/> | <input type="checkbox"/> <input type="checkbox"/> _/_/____<br><input type="checkbox"/> | 9 <input type="checkbox"/> ONGOING |
| 6                                                            | <input type="checkbox"/> <input type="checkbox"/> _/_/____<br><input type="checkbox"/> | <input type="checkbox"/> <input type="checkbox"/> _/_/____<br><input type="checkbox"/> | 9 <input type="checkbox"/> ONGOING |
| 7                                                            | <input type="checkbox"/> <input type="checkbox"/> _/_/____<br><input type="checkbox"/> | <input type="checkbox"/> <input type="checkbox"/> _/_/____<br><input type="checkbox"/> | 9 <input type="checkbox"/> ONGOING |
| 8                                                            | <input type="checkbox"/> <input type="checkbox"/> _/_/____<br><input type="checkbox"/> | <input type="checkbox"/> <input type="checkbox"/> _/_/____<br><input type="checkbox"/> | 9 <input type="checkbox"/> ONGOING |
| 9                                                            | <input type="checkbox"/> <input type="checkbox"/> _/_/____<br><input type="checkbox"/> | <input type="checkbox"/> <input type="checkbox"/> _/_/____<br><input type="checkbox"/> | 9 <input type="checkbox"/> ONGOING |

**Laboratory Analysis**

| Parameter                   | Unit  | Result |
|-----------------------------|-------|--------|
| SPO <sub>2</sub>            |       | □□□    |
| Arterial blood gas analysis |       |        |
| PH                          |       | □.□□   |
| PaCO <sub>2</sub>           | mmHg  | □□□    |
| PaO <sub>2</sub>            | mmHg  | □□□    |
| HCO <sub>3</sub>            | mEq/L | □□     |

**Intervention Phase**

|                                                                    |                                                                            |                                                |                                                                                              |                                                    |
|--------------------------------------------------------------------|----------------------------------------------------------------------------|------------------------------------------------|----------------------------------------------------------------------------------------------|----------------------------------------------------|
| Date<br>DD/MM/YYYY                                                 | ____ / ____ / ____                                                         |                                                |                                                                                              |                                                    |
| Group                                                              | 1 <input type="checkbox"/> Group R                                         |                                                | 2 <input type="checkbox"/> Group S                                                           |                                                    |
| Whether or not hypoxemia occurs                                    |                                                                            |                                                |                                                                                              |                                                    |
| 1 <input type="checkbox"/> subclinical hypoxemia (SPO2 of 90-95%), | 2 <input type="checkbox"/> moderate hypoxemia (SPO2 of 75-89%, $\leq 60$ s |                                                | 3 <input type="checkbox"/> severe hypoxemia (SpO2 < 90% for >60 s or SpO2 < 75% at any time) |                                                    |
| Management of hypoxemia                                            |                                                                            |                                                |                                                                                              |                                                    |
| 1 <input type="checkbox"/> patient stimulation                     | 2 <input type="checkbox"/> increasing the volume of supplementary oxygen   | 3 <input type="checkbox"/> jaw-thrust maneuver | 4 <input type="checkbox"/> mask ventilation                                                  | 5 <input type="checkbox"/> mechanical ventilation. |
| Puchner five-point fiber-optic intubation comfort scale            |                                                                            |                                                |                                                                                              |                                                    |
| 1 <input type="checkbox"/> No reaction                             | 2 <input type="checkbox"/> Slight grimacing                                | 3 <input type="checkbox"/> Heavy grimacing     | 4 <input type="checkbox"/> Verbal objection                                                  | 5 <input type="checkbox"/> Defensive movement      |

|                          |                                              |                                                                            |
|--------------------------|----------------------------------------------|----------------------------------------------------------------------------|
| T0                       | 10 minutes after entering the operation room |                                                                            |
| Parameter                | Unit                                         | Result                                                                     |
| Systolic Blood Pressure  | mmHg                                         | <input type="checkbox"/> <input type="checkbox"/> <input type="checkbox"/> |
| Diastolic Blood Pressure | mmHg                                         | <input type="checkbox"/> <input type="checkbox"/> <input type="checkbox"/> |
| Heart Rate               | beats/minute                                 | <input type="checkbox"/> <input type="checkbox"/> <input type="checkbox"/> |
| Respiratory Rate         | breaths/minute                               | <input type="checkbox"/> <input type="checkbox"/>                          |
| Spo2                     |                                              | <input type="checkbox"/> <input type="checkbox"/> <input type="checkbox"/> |

|                          |                                    |                                                                            |                            |
|--------------------------|------------------------------------|----------------------------------------------------------------------------|----------------------------|
| T1                       | Cp and Ce has achieved equilibrium |                                                                            |                            |
| Parameter                | Unit                               | Result                                                                     |                            |
| Systolic Blood Pressure  | mmHg                               | <input type="checkbox"/> <input type="checkbox"/> <input type="checkbox"/> |                            |
| Diastolic Blood Pressure | mmHg                               | <input type="checkbox"/> <input type="checkbox"/> <input type="checkbox"/> |                            |
| Heart Rate               | beats/minute                       | <input type="checkbox"/> <input type="checkbox"/> <input type="checkbox"/> |                            |
| Respiratory Rate         | breaths/minute                     | <input type="checkbox"/> <input type="checkbox"/>                          |                            |
| Spo2                     |                                    | <input type="checkbox"/> <input type="checkbox"/> <input type="checkbox"/> |                            |
| Ramsay Sedation Scale    | 1 <input type="checkbox"/>         | 2 <input type="checkbox"/>                                                 | 3 <input type="checkbox"/> |
|                          | 4 <input type="checkbox"/>         | 5 <input type="checkbox"/>                                                 | 6 <input type="checkbox"/> |
|                          | 7 <input type="checkbox"/>         | 8 <input type="checkbox"/>                                                 |                            |
| Cough                    | 1 <input type="checkbox"/>         | 2 <input type="checkbox"/>                                                 | 3 <input type="checkbox"/> |



|       |                            |                                                   |                            |
|-------|----------------------------|---------------------------------------------------|----------------------------|
|       | 4 <input type="checkbox"/> | 5 <input type="checkbox"/>                        | 6 <input type="checkbox"/> |
| EtCO2 | mmHg                       | <input type="checkbox"/> <input type="checkbox"/> |                            |

| T2                       | When bronchoscope is inserted |                                                                            |                            |
|--------------------------|-------------------------------|----------------------------------------------------------------------------|----------------------------|
| Parameter                | Unit                          | Result                                                                     |                            |
| Systolic Blood Pressure  | mmHg                          | <input type="checkbox"/> <input type="checkbox"/> <input type="checkbox"/> |                            |
| Diastolic Blood Pressure | mmHg                          | <input type="checkbox"/> <input type="checkbox"/> <input type="checkbox"/> |                            |
| Heart Rate               | beats/minute                  | <input type="checkbox"/> <input type="checkbox"/> <input type="checkbox"/> |                            |
| Respiratory Rate         | breaths/minute                | <input type="checkbox"/> <input type="checkbox"/>                          |                            |
| Spo2                     |                               | <input type="checkbox"/> <input type="checkbox"/> <input type="checkbox"/> |                            |
| Ramsay Sedation Scale    | 1 <input type="checkbox"/>    | 2 <input type="checkbox"/>                                                 | 3 <input type="checkbox"/> |
|                          | 4 <input type="checkbox"/>    | 5 <input type="checkbox"/>                                                 | 6 <input type="checkbox"/> |
|                          | 7 <input type="checkbox"/>    | 8 <input type="checkbox"/>                                                 |                            |
| Cough                    | 1 <input type="checkbox"/>    | 2 <input type="checkbox"/>                                                 | 3 <input type="checkbox"/> |
|                          | 4 <input type="checkbox"/>    | 5 <input type="checkbox"/>                                                 | 6 <input type="checkbox"/> |
| EtCO2                    | mmHg                          | <input type="checkbox"/> <input type="checkbox"/>                          |                            |

| T3                       | 1 minute after bronchoscope is inserted |                                                                            |                            |
|--------------------------|-----------------------------------------|----------------------------------------------------------------------------|----------------------------|
| Parameter                | Unit                                    | Result                                                                     |                            |
| Systolic Blood Pressure  | mmHg                                    | <input type="checkbox"/> <input type="checkbox"/> <input type="checkbox"/> |                            |
| Diastolic Blood Pressure | mmHg                                    | <input type="checkbox"/> <input type="checkbox"/> <input type="checkbox"/> |                            |
| Heart Rate               | beats/minute                            | <input type="checkbox"/> <input type="checkbox"/> <input type="checkbox"/> |                            |
| Respiratory Rate         | breaths/minute                          | <input type="checkbox"/> <input type="checkbox"/>                          |                            |
| Spo2                     |                                         | <input type="checkbox"/> <input type="checkbox"/> <input type="checkbox"/> |                            |
| Ramsay Sedation Scale    | 1 <input type="checkbox"/>              | 2 <input type="checkbox"/>                                                 | 3 <input type="checkbox"/> |
|                          | 4 <input type="checkbox"/>              | 5 <input type="checkbox"/>                                                 | 6 <input type="checkbox"/> |
|                          | 7 <input type="checkbox"/>              | 8 <input type="checkbox"/>                                                 |                            |
| Cough                    | 1 <input type="checkbox"/>              | 2 <input type="checkbox"/>                                                 | 3 <input type="checkbox"/> |
|                          | 4 <input type="checkbox"/>              | 5 <input type="checkbox"/>                                                 | 6 <input type="checkbox"/> |
| EtCO2                    | mmHg                                    | <input type="checkbox"/> <input type="checkbox"/>                          |                            |

| T4                      | 5 minutes after bronchoscope is inserted |                                                                            |
|-------------------------|------------------------------------------|----------------------------------------------------------------------------|
| Parameter               | Unit                                     | Result                                                                     |
| Systolic Blood Pressure | mmHg                                     | <input type="checkbox"/> <input type="checkbox"/> <input type="checkbox"/> |

|                          |                            |                                                                |                            |
|--------------------------|----------------------------|----------------------------------------------------------------|----------------------------|
| Diastolic Blood Pressure | mmHg                       | <input type="text"/> <input type="text"/> <input type="text"/> |                            |
| Heart Rate               | beats/minute               | <input type="text"/> <input type="text"/> <input type="text"/> |                            |
| Respiratory Rate         | breaths/minute             | <input type="text"/> <input type="text"/>                      |                            |
| Spo2                     |                            | <input type="text"/> <input type="text"/> <input type="text"/> |                            |
| Ramsay Sedation Scale    | 1 <input type="checkbox"/> | 2 <input type="checkbox"/>                                     | 3 <input type="checkbox"/> |
|                          | 4 <input type="checkbox"/> | 5 <input type="checkbox"/>                                     | 6 <input type="checkbox"/> |
|                          | 7 <input type="checkbox"/> | 8 <input type="checkbox"/>                                     |                            |
| Cough                    | 1 <input type="checkbox"/> | 2 <input type="checkbox"/>                                     | 3 <input type="checkbox"/> |
|                          | 4 <input type="checkbox"/> | 5 <input type="checkbox"/>                                     | 6 <input type="checkbox"/> |
| EtCO2                    | mmHg                       | <input type="text"/> <input type="text"/>                      |                            |

|                          |                                           |                                                                |                            |
|--------------------------|-------------------------------------------|----------------------------------------------------------------|----------------------------|
| T5                       | 10 minutes after bronchoscope is inserted |                                                                |                            |
| Parameter                | Unit                                      | Result                                                         |                            |
| Systolic Blood Pressure  | mmHg                                      | <input type="text"/> <input type="text"/> <input type="text"/> |                            |
| Diastolic Blood Pressure | mmHg                                      | <input type="text"/> <input type="text"/> <input type="text"/> |                            |
| Heart Rate               | beats/minute                              | <input type="text"/> <input type="text"/> <input type="text"/> |                            |
| Respiratory Rate         | breaths/minute                            | <input type="text"/> <input type="text"/>                      |                            |
| Spo2                     |                                           | <input type="text"/> <input type="text"/> <input type="text"/> |                            |
| Ramsay Sedation Scale    | 1 <input type="checkbox"/>                | 2 <input type="checkbox"/>                                     | 3 <input type="checkbox"/> |
|                          | 4 <input type="checkbox"/>                | 5 <input type="checkbox"/>                                     | 6 <input type="checkbox"/> |
|                          | 7 <input type="checkbox"/>                | 8 <input type="checkbox"/>                                     |                            |
| Cough                    | 1 <input type="checkbox"/>                | 2 <input type="checkbox"/>                                     | 3 <input type="checkbox"/> |
|                          | 4 <input type="checkbox"/>                | 5 <input type="checkbox"/>                                     | 6 <input type="checkbox"/> |
| EtCO2                    | mmHg                                      | <input type="text"/> <input type="text"/>                      |                            |

|                          |                                           |                                                                |                            |
|--------------------------|-------------------------------------------|----------------------------------------------------------------|----------------------------|
| T6                       | 15 minutes after bronchoscope is inserted |                                                                |                            |
| Parameter                | Unit                                      | Result                                                         |                            |
| Systolic Blood Pressure  | mmHg                                      | <input type="text"/> <input type="text"/> <input type="text"/> |                            |
| Diastolic Blood Pressure | mmHg                                      | <input type="text"/> <input type="text"/> <input type="text"/> |                            |
| Heart Rate               | beats/minute                              | <input type="text"/> <input type="text"/> <input type="text"/> |                            |
| Respiratory Rate         | breaths/minute                            | <input type="text"/> <input type="text"/>                      |                            |
| Spo2                     |                                           | <input type="text"/> <input type="text"/> <input type="text"/> |                            |
| Ramsay Sedation Scale    | 1 <input type="checkbox"/>                | 2 <input type="checkbox"/>                                     | 3 <input type="checkbox"/> |
|                          | 4 <input type="checkbox"/>                | 5 <input type="checkbox"/>                                     | 6 <input type="checkbox"/> |
|                          | 7 <input type="checkbox"/>                | 8 <input type="checkbox"/>                                     |                            |
| Cough                    | 1 <input type="checkbox"/>                | 2 <input type="checkbox"/>                                     | 3 <input type="checkbox"/> |

|       |                            |                                                   |                            |
|-------|----------------------------|---------------------------------------------------|----------------------------|
|       | 4 <input type="checkbox"/> | 5 <input type="checkbox"/>                        | 6 <input type="checkbox"/> |
| EtCO2 | mmHg                       | <input type="checkbox"/> <input type="checkbox"/> |                            |

|                          |                                           |                                                                            |                            |
|--------------------------|-------------------------------------------|----------------------------------------------------------------------------|----------------------------|
| T6                       | 20 minutes after bronchoscope is inserted |                                                                            |                            |
| Parameter                | Unit                                      | Result                                                                     |                            |
| Systolic Blood Pressure  | mmHg                                      | <input type="checkbox"/> <input type="checkbox"/> <input type="checkbox"/> |                            |
| Diastolic Blood Pressure | mmHg                                      | <input type="checkbox"/> <input type="checkbox"/> <input type="checkbox"/> |                            |
| Heart Rate               | beats/minute                              | <input type="checkbox"/> <input type="checkbox"/> <input type="checkbox"/> |                            |
| Respiratory Rate         | breaths/minute                            | <input type="checkbox"/> <input type="checkbox"/>                          |                            |
| Spo2                     |                                           | <input type="checkbox"/> <input type="checkbox"/> <input type="checkbox"/> |                            |
| Ramsay Sedation Scale    | 1 <input type="checkbox"/>                | 2 <input type="checkbox"/>                                                 | 3 <input type="checkbox"/> |
|                          | 4 <input type="checkbox"/>                | 5 <input type="checkbox"/>                                                 | 6 <input type="checkbox"/> |
|                          | 7 <input type="checkbox"/>                | 8 <input type="checkbox"/>                                                 |                            |
| Cough                    | 1 <input type="checkbox"/>                | 2 <input type="checkbox"/>                                                 | 3 <input type="checkbox"/> |
|                          | 4 <input type="checkbox"/>                | 5 <input type="checkbox"/>                                                 | 6 <input type="checkbox"/> |
| EtCO2                    | mmHg                                      | <input type="checkbox"/> <input type="checkbox"/>                          |                            |

|                          |                                           |                                                                            |                            |
|--------------------------|-------------------------------------------|----------------------------------------------------------------------------|----------------------------|
| T7                       | 25 minutes after bronchoscope is inserted |                                                                            |                            |
| Parameter                | Unit                                      | Result                                                                     |                            |
| Systolic Blood Pressure  | mmHg                                      | <input type="checkbox"/> <input type="checkbox"/> <input type="checkbox"/> |                            |
| Diastolic Blood Pressure | mmHg                                      | <input type="checkbox"/> <input type="checkbox"/> <input type="checkbox"/> |                            |
| Heart Rate               | beats/minute                              | <input type="checkbox"/> <input type="checkbox"/> <input type="checkbox"/> |                            |
| Respiratory Rate         | breaths/minute                            | <input type="checkbox"/> <input type="checkbox"/>                          |                            |
| Spo2                     |                                           | <input type="checkbox"/> <input type="checkbox"/> <input type="checkbox"/> |                            |
| Ramsay Sedation Scale    | 1 <input type="checkbox"/>                | 2 <input type="checkbox"/>                                                 | 3 <input type="checkbox"/> |
|                          | 4 <input type="checkbox"/>                | 5 <input type="checkbox"/>                                                 | 6 <input type="checkbox"/> |
|                          | 7 <input type="checkbox"/>                | 8 <input type="checkbox"/>                                                 |                            |
| Cough                    | 1 <input type="checkbox"/>                | 2 <input type="checkbox"/>                                                 | 3 <input type="checkbox"/> |
|                          | 4 <input type="checkbox"/>                | 5 <input type="checkbox"/>                                                 | 6 <input type="checkbox"/> |
| EtCO2                    | mmHg                                      | <input type="checkbox"/> <input type="checkbox"/>                          |                            |

|                         |                                           |                                                                            |  |
|-------------------------|-------------------------------------------|----------------------------------------------------------------------------|--|
| T8                      | 30 minutes after bronchoscope is inserted |                                                                            |  |
| Parameter               | Unit                                      | Result                                                                     |  |
| Systolic Blood Pressure | mmHg                                      | <input type="checkbox"/> <input type="checkbox"/> <input type="checkbox"/> |  |

|                          |                            |                                                                            |                            |
|--------------------------|----------------------------|----------------------------------------------------------------------------|----------------------------|
| Diastolic Blood Pressure | mmHg                       | <input type="checkbox"/> <input type="checkbox"/> <input type="checkbox"/> |                            |
| Heart Rate               | beats/minute               | <input type="checkbox"/> <input type="checkbox"/> <input type="checkbox"/> |                            |
| Respiratory Rate         | breaths/minute             | <input type="checkbox"/> <input type="checkbox"/>                          |                            |
| Spo2                     |                            | <input type="checkbox"/> <input type="checkbox"/> <input type="checkbox"/> |                            |
| Ramsay Sedation Scale    | 1 <input type="checkbox"/> | 2 <input type="checkbox"/>                                                 | 3 <input type="checkbox"/> |
|                          | 4 <input type="checkbox"/> | 5 <input type="checkbox"/>                                                 | 6 <input type="checkbox"/> |
|                          | 7 <input type="checkbox"/> | 8 <input type="checkbox"/>                                                 |                            |
| Cough                    | 1 <input type="checkbox"/> | 2 <input type="checkbox"/>                                                 | 3 <input type="checkbox"/> |
|                          | 4 <input type="checkbox"/> | 5 <input type="checkbox"/>                                                 | 6 <input type="checkbox"/> |
| EtCO2                    | mmHg                       | <input type="checkbox"/> <input type="checkbox"/>                          |                            |

|                          |                                           |                                                                            |                            |
|--------------------------|-------------------------------------------|----------------------------------------------------------------------------|----------------------------|
| T9                       | 60 minutes after bronchoscope is inserted |                                                                            |                            |
| Parameter                | Unit                                      | Result                                                                     |                            |
| Systolic Blood Pressure  | mmHg                                      | <input type="checkbox"/> <input type="checkbox"/> <input type="checkbox"/> |                            |
| Diastolic Blood Pressure | mmHg                                      | <input type="checkbox"/> <input type="checkbox"/> <input type="checkbox"/> |                            |
| Heart Rate               | beats/minute                              | <input type="checkbox"/> <input type="checkbox"/> <input type="checkbox"/> |                            |
| Respiratory Rate         | breaths/minute                            | <input type="checkbox"/> <input type="checkbox"/>                          |                            |
| Spo2                     |                                           | <input type="checkbox"/> <input type="checkbox"/> <input type="checkbox"/> |                            |
| Ramsay Sedation Scale    | 1 <input type="checkbox"/>                | 2 <input type="checkbox"/>                                                 | 3 <input type="checkbox"/> |
|                          | 4 <input type="checkbox"/>                | 5 <input type="checkbox"/>                                                 | 6 <input type="checkbox"/> |
|                          | 7 <input type="checkbox"/>                | 8 <input type="checkbox"/>                                                 |                            |
| Cough                    | 1 <input type="checkbox"/>                | 2 <input type="checkbox"/>                                                 | 3 <input type="checkbox"/> |
|                          | 4 <input type="checkbox"/>                | 5 <input type="checkbox"/>                                                 | 6 <input type="checkbox"/> |
| EtCO2                    | mmHg                                      | <input type="checkbox"/> <input type="checkbox"/>                          |                            |

|                                                    |                                                                                                     |                                        |                            |                                                                            |
|----------------------------------------------------|-----------------------------------------------------------------------------------------------------|----------------------------------------|----------------------------|----------------------------------------------------------------------------|
| Type of fiberoptic bronchoscopy procedure          |                                                                                                     |                                        |                            |                                                                            |
| 1 <input type="checkbox"/> Diagnostic              |                                                                                                     | 2 <input type="checkbox"/> Therapeutic |                            |                                                                            |
| If it is Therapeutic bronchoscopy                  |                                                                                                     |                                        |                            |                                                                            |
| 1 <input type="checkbox"/> Injection of medication | 2 <input type="checkbox"/> Endotherm knife                                                          | 3 <input type="checkbox"/> Cryotherapy |                            |                                                                            |
| 4 <input type="checkbox"/> Laser                   | 5 <input type="checkbox"/> Stent                                                                    |                                        |                            |                                                                            |
| Operation time                                     | <input type="checkbox"/> <input type="checkbox"/> <input type="checkbox"/> <input type="checkbox"/> | min                                    | Endoscopist                | <input type="checkbox"/> <input type="checkbox"/> <input type="checkbox"/> |
| Satisfaction scores of bronchoscopist              | 1 <input type="checkbox"/>                                                                          | 2 <input type="checkbox"/>             | 3 <input type="checkbox"/> |                                                                            |
|                                                    | 4 <input type="checkbox"/>                                                                          | 5 <input type="checkbox"/>             |                            |                                                                            |
| Satisfaction scores of anaesthesiologist           | 1 <input type="checkbox"/>                                                                          | 2 <input type="checkbox"/>             | 3 <input type="checkbox"/> |                                                                            |
|                                                    | 4 <input type="checkbox"/>                                                                          | 5 <input type="checkbox"/>             |                            |                                                                            |

| Vasoactive drugs used                                                                                                               |                                |                                                                                                                                                                                                                                 |                                                                 |
|-------------------------------------------------------------------------------------------------------------------------------------|--------------------------------|---------------------------------------------------------------------------------------------------------------------------------------------------------------------------------------------------------------------------------|-----------------------------------------------------------------|
| Whether or not vasoactive drugs are used                                                                                            | 1 <input type="checkbox"/> Yes | 2 <input type="checkbox"/> No                                                                                                                                                                                                   |                                                                 |
| Vasoactive drug type                                                                                                                | name                           | dosage                                                                                                                                                                                                                          | whether it is effective or not                                  |
| 1 <input type="checkbox"/> vasoconstrictor<br>2 <input type="checkbox"/> vasodilator<br>3 <input type="checkbox"/> Inotropic agents |                                | 1 <input type="checkbox"/> <input type="checkbox"/> <input type="checkbox"/> <input type="checkbox"/> $\mu$<br>g<br>2 <input type="checkbox"/> <input type="checkbox"/> <input type="checkbox"/> <input type="checkbox"/><br>mg | 1 <input type="checkbox"/> Yes<br>2 <input type="checkbox"/> No |
| 1 <input type="checkbox"/> vasoconstrictor<br>2 <input type="checkbox"/> vasodilator<br>3 <input type="checkbox"/> Inotropic agents |                                | 1 <input type="checkbox"/> <input type="checkbox"/> <input type="checkbox"/> <input type="checkbox"/> $\mu$<br>g<br>2 <input type="checkbox"/> <input type="checkbox"/> <input type="checkbox"/> <input type="checkbox"/><br>mg | 1 <input type="checkbox"/> Yes<br>2 <input type="checkbox"/> No |
| 1 <input type="checkbox"/> vasoconstrictor<br>2 <input type="checkbox"/> vasodilator<br>3 <input type="checkbox"/> Inotropic agents |                                | 1 <input type="checkbox"/> <input type="checkbox"/> <input type="checkbox"/> <input type="checkbox"/> $\mu$<br>g<br>2 <input type="checkbox"/> <input type="checkbox"/> <input type="checkbox"/> <input type="checkbox"/><br>mg | 1 <input type="checkbox"/> Yes<br>2 <input type="checkbox"/> No |
| 1 <input type="checkbox"/> vasoconstrictor<br>2 <input type="checkbox"/> vasodilator<br>3 <input type="checkbox"/> Inotropic agents |                                | 1 <input type="checkbox"/> <input type="checkbox"/> <input type="checkbox"/> <input type="checkbox"/> $\mu$<br>g<br>2 <input type="checkbox"/> <input type="checkbox"/> <input type="checkbox"/> <input type="checkbox"/><br>mg | 1 <input type="checkbox"/> Yes<br>2 <input type="checkbox"/> No |
| 1 <input type="checkbox"/> vasoconstrictor<br>2 <input type="checkbox"/> vasodilator<br>3 <input type="checkbox"/> Inotropic agents |                                | 1 <input type="checkbox"/> <input type="checkbox"/> <input type="checkbox"/> <input type="checkbox"/> $\mu$<br>g<br>2 <input type="checkbox"/> <input type="checkbox"/> <input type="checkbox"/> <input type="checkbox"/><br>mg | 1 <input type="checkbox"/> Yes<br>2 <input type="checkbox"/> No |
| 1 <input type="checkbox"/> vasoconstrictor<br>2 <input type="checkbox"/> vasodilator<br>3 <input type="checkbox"/> Inotropic agents |                                | 1 <input type="checkbox"/> <input type="checkbox"/> <input type="checkbox"/> <input type="checkbox"/> $\mu$<br>g<br>2 <input type="checkbox"/> <input type="checkbox"/> <input type="checkbox"/> <input type="checkbox"/><br>mg | 1 <input type="checkbox"/> Yes<br>2 <input type="checkbox"/> No |
| 1 <input type="checkbox"/> vasoconstrictor<br>2 <input type="checkbox"/> vasodilator<br>3 <input type="checkbox"/> Inotropic agents |                                | 1 <input type="checkbox"/> <input type="checkbox"/> <input type="checkbox"/> <input type="checkbox"/> $\mu$<br>g<br>2 <input type="checkbox"/> <input type="checkbox"/> <input type="checkbox"/> <input type="checkbox"/><br>mg | 1 <input type="checkbox"/> Yes<br>2 <input type="checkbox"/> No |
| 1 <input type="checkbox"/> vasoconstrictor<br>2 <input type="checkbox"/> vasodilator<br>3 <input type="checkbox"/> Inotropic agents |                                | 1 <input type="checkbox"/> <input type="checkbox"/> <input type="checkbox"/> <input type="checkbox"/> $\mu$<br>g<br>2 <input type="checkbox"/> <input type="checkbox"/> <input type="checkbox"/> <input type="checkbox"/><br>mg | 1 <input type="checkbox"/> Yes<br>2 <input type="checkbox"/> No |

**Post Intervention Phase**

|                                                            |                                                                            |                                                                              |                                |                                                  |
|------------------------------------------------------------|----------------------------------------------------------------------------|------------------------------------------------------------------------------|--------------------------------|--------------------------------------------------|
| Recovery time                                              | <input type="checkbox"/> <input type="checkbox"/> <input type="checkbox"/> | min                                                                          |                                |                                                  |
| Whether nausea and vomiting occur                          |                                                                            |                                                                              |                                |                                                  |
| 1 <input type="checkbox"/> Yes                             | 2 <input type="checkbox"/> No                                              |                                                                              |                                |                                                  |
| Assessment of PONV                                         |                                                                            |                                                                              |                                |                                                  |
| 1 <input type="checkbox"/> Mild                            | 2 <input type="checkbox"/> moderate                                        | 3 <input type="checkbox"/> severe                                            |                                |                                                  |
| Satisfaction scores of the patient                         |                                                                            |                                                                              |                                |                                                  |
| 1 <input type="checkbox"/>                                 | 2 <input type="checkbox"/>                                                 | 3 <input type="checkbox"/>                                                   | 4 <input type="checkbox"/>     | 5 <input type="checkbox"/>                       |
| willingness of the patient to undergo repeat bronchoscopy. |                                                                            |                                                                              |                                |                                                  |
| 1 <input type="checkbox"/> Not at all likely               | 2 <input type="checkbox"/> 1-3                                             | 3 <input type="checkbox"/> 4-6                                               | 4 <input type="checkbox"/> 7-9 | 5 <input type="checkbox"/> Extremely likely (10) |
| VAS scores of sore throat                                  |                                                                            |                                                                              |                                |                                                  |
| 1 <input type="checkbox"/>                                 | 2 <input type="checkbox"/>                                                 | 3 <input type="checkbox"/>                                                   | 4 <input type="checkbox"/>     | 5 <input type="checkbox"/>                       |
| 6 <input type="checkbox"/>                                 | 7 <input type="checkbox"/>                                                 | 8 <input type="checkbox"/>                                                   | 9 <input type="checkbox"/>     | 10 <input type="checkbox"/>                      |
| T10                                                        | At PACU                                                                    |                                                                              |                                |                                                  |
| Parameter                                                  | Unit                                                                       | Result                                                                       |                                |                                                  |
| Systolic Blood Pressure                                    | mmHg                                                                       | <input type="checkbox"/> <input type="checkbox"/> <input type="checkbox"/>   |                                |                                                  |
| Diastolic Blood Pressure                                   | mmHg                                                                       | <input type="checkbox"/> <input type="checkbox"/> <input type="checkbox"/>   |                                |                                                  |
| Heart Rate                                                 | beats/minute                                                               | <input type="checkbox"/> <input type="checkbox"/> <input type="checkbox"/>   |                                |                                                  |
| Respiratory Rate                                           | breaths/minute                                                             | <input type="checkbox"/> <input type="checkbox"/>                            |                                |                                                  |
| Spo2                                                       |                                                                            | <input type="checkbox"/> <input type="checkbox"/> <input type="checkbox"/>   |                                |                                                  |
| Ramsay Sedation Scale                                      | 1 <input type="checkbox"/>                                                 | 2 <input type="checkbox"/>                                                   | 3 <input type="checkbox"/>     |                                                  |
|                                                            | 4 <input type="checkbox"/>                                                 | 5 <input type="checkbox"/>                                                   | 6 <input type="checkbox"/>     |                                                  |
|                                                            | 7 <input type="checkbox"/>                                                 | 8 <input type="checkbox"/>                                                   |                                |                                                  |
| Cough                                                      | 1 <input type="checkbox"/>                                                 | 2 <input type="checkbox"/>                                                   | 3 <input type="checkbox"/>     | 4 <input type="checkbox"/>                       |
| Arterial blood gas analysis                                |                                                                            |                                                                              |                                |                                                  |
| PH                                                         |                                                                            | <input type="checkbox"/> . <input type="checkbox"/> <input type="checkbox"/> |                                |                                                  |
| PaCO <sub>2</sub>                                          | mmHg                                                                       | <input type="checkbox"/> <input type="checkbox"/> <input type="checkbox"/>   |                                |                                                  |
| PaO <sub>2</sub>                                           | mmHg                                                                       | <input type="checkbox"/> <input type="checkbox"/> <input type="checkbox"/>   |                                |                                                  |
| HCO <sub>3</sub>                                           | mEq/L                                                                      | <input type="checkbox"/> <input type="checkbox"/>                            |                                |                                                  |

**Adverse Event information**

|                                                          |                                                             |                                                   |
|----------------------------------------------------------|-------------------------------------------------------------|---------------------------------------------------|
| Whether adverse events occurred                          |                                                             |                                                   |
| 1 <input type="checkbox"/> Yes                           | 2 <input type="checkbox"/> No                               |                                                   |
| Whether serious adverse events occurred                  |                                                             |                                                   |
| 1 <input type="checkbox"/> Yes                           | 2 <input type="checkbox"/> No                               |                                                   |
| Describe the AE and the connection to project procedures |                                                             |                                                   |
|                                                          |                                                             |                                                   |
| AE onset date                                            | □□/□□/□□□□                                                  | DD/MM/YYYY                                        |
| AE stop date                                             | □□/□□/□□□□                                                  | DD/MM/YYYY                                        |
| Date of AE awareness                                     | □□/□□/□□□□                                                  | DD/MM/YYYY                                        |
| Severity                                                 |                                                             |                                                   |
| 1 <input type="checkbox"/> mild                          | 2 <input type="checkbox"/> moderate                         | 3 <input type="checkbox"/> severe                 |
| Outcome                                                  |                                                             |                                                   |
| 1 <input type="checkbox"/> recovered/resolved            | 2 <input type="checkbox"/> recovered/resolved with sequelae | 3 <input type="checkbox"/> study participant died |
| 4 <input type="checkbox"/> continuing                    | 5 <input type="checkbox"/> unknown                          | 6 <input type="checkbox"/> other                  |
| SAE causality                                            |                                                             |                                                   |
| 1 <input type="checkbox"/> Not related                   | 2 <input type="checkbox"/> Unlikely                         | 3 <input type="checkbox"/> Possibly               |
| 4 <input type="checkbox"/> Probably                      | 5 <input type="checkbox"/> Definitely                       |                                                   |
| Describe the AE and the connection to project procedures |                                                             |                                                   |
|                                                          |                                                             |                                                   |
| AE onset date                                            | □□/□□/□□□□                                                  | DD/MM/YYYY                                        |
| AE stop date                                             | □□/□□/□□□□                                                  | DD/MM/YYYY                                        |
| Date of AE awareness                                     | □□/□□/□□□□                                                  | DD/MM/YYYY                                        |
| Severity                                                 |                                                             |                                                   |
| 1 <input type="checkbox"/> mild                          | 2 <input type="checkbox"/> moderate                         | 3 <input type="checkbox"/> severe                 |
| Outcome                                                  |                                                             |                                                   |
| 1 <input type="checkbox"/> recovered/resolved            | 2 <input type="checkbox"/> recovered/resolved with sequelae | 3 <input type="checkbox"/> study participant died |

|                                                          |                                                                    |                                                   |
|----------------------------------------------------------|--------------------------------------------------------------------|---------------------------------------------------|
| 4 <input type="checkbox"/> continuing                    | 5 <input type="checkbox"/> unknown                                 | 6 <input type="checkbox"/> other                  |
| SAE causality                                            |                                                                    |                                                   |
| 1 <input type="checkbox"/> Not related                   | 2 <input type="checkbox"/> Unlikely                                | 3 <input type="checkbox"/> Possibly               |
| 4 <input type="checkbox"/> Probably                      | 5 <input type="checkbox"/> Definitely                              |                                                   |
| Describe the AE and the connection to project procedures |                                                                    |                                                   |
|                                                          |                                                                    |                                                   |
| AE onset date                                            | <input type="text"/> / <input type="text"/> / <input type="text"/> | DD/MM/YYYY                                        |
| AE stop date                                             | <input type="text"/> / <input type="text"/> / <input type="text"/> | DD/MM/YYYY                                        |
| Date of AE awareness                                     | <input type="text"/> / <input type="text"/> / <input type="text"/> | DD/MM/YYYY                                        |
| Severity                                                 |                                                                    |                                                   |
| 1 <input type="checkbox"/> mild                          | 2 <input type="checkbox"/> moderate                                | 3 <input type="checkbox"/> severe                 |
| Outcome                                                  |                                                                    |                                                   |
| 1 <input type="checkbox"/> recovered/resolved            | 2 <input type="checkbox"/> recovered/resolved with sequelae        | 3 <input type="checkbox"/> study participant died |
| 4 <input type="checkbox"/> continuing                    | 5 <input type="checkbox"/> unknown                                 | 6 <input type="checkbox"/> other                  |
| SAE causality                                            |                                                                    |                                                   |
| 1 <input type="checkbox"/> Not related                   | 2 <input type="checkbox"/> Unlikely                                | 3 <input type="checkbox"/> Possibly               |
| 4 <input type="checkbox"/> Probably                      | 5 <input type="checkbox"/> Definitely                              |                                                   |
